# Supplementary material
Source: ML conference proceedings conference paper supplement (https://openreview.net/forum?id=Zmosb2KfzYd)
Supplement: supplementary_material [file attachment]

---

# Supplementary Material for TAP-Vid: A Benchmark for Tracking Any Point in a Video

---

Carl Doersch\*    Ankush Gupta\*    Larisa Markeeva\*    Adrià Recasens\*  
Lucas Smaira\*    Yusuf Aytar\*    João Carreira\*    Andrew Zisserman\*<sup>†</sup>    Yi Yang\*

\*DeepMind

<sup>†</sup>VGG, Department of Engineering Science, University of Oxford

## 1 Dataset Examples

To provide more context and information to the reader, we expand Figure 2 in the paper providing many examples per dataset. We provide examples of TAP-Vid-Kinetics in Figures 1 and 2, TAP-Vid-Davis in Figure 3 and TAP-Vid-Kubric and TAP-Vid-RGB-Stacking in Figure 4. These figures illustrate the diversity of the tracked points across all the different datasets. Figures 1, 2 and 3 show how we are tracking points beyond the most salient objects in the video; the vast majority of tracked points do not correspond to the semantic keypoints of existing datasets. The website contains even more examples in video format, under the ‘Visualized Ground Truth Examples’ heading.

## 2 Supplementary Videos, Code, and Website

The website for this project <https://storage.googleapis.com/dm-tapnet/index.html> contains the following:

1. **Ground Truth Point Tracking Annotations.** Video examples of groundtruth point annotations in our datasets, as summarized in Section 1 above.
2. **Dataset Download Links and Processing.** Download links for the TAP-Vid- { Kinetics, DAVIS, RGB-Stacking } datasets, and instructions for processing and aligning raw Kinetics videos to the annotations and for running the visualization scripts. It also includes licensing information.
3. **Improving Human Point Annotation with Flow-Based Tracker.** Comparison of human point annotation quality on the DAVIS dataset with and without optical flow track assistance.

The `index.html` included with this supplementary file contains some supplementary information which is not included in the TAP-Vid webpage as we do not consider it a part of the dataset:

1. **DAVIS/RGB-Stacking Point Tracks Prediction.** TAP-Net point tracking predictions on videos from the DAVIS point tracking benchmark and from the RGB-Stacking robotics benchmark.
2. **Videos used for Quantitative Evaluation of the Flow-Based Tracker.** For reference, we include the exact 10 videos that annotators labeled before their annotations were compared with Kubric ground truth.

## 3 Annotation Instructions and Workflow

Figure 5 summarizes the guidelines given to the annotators to encourage acquisition of high-quality point tracks. Note, the guidelines do not limit the scope of the kind or type of points the annotators

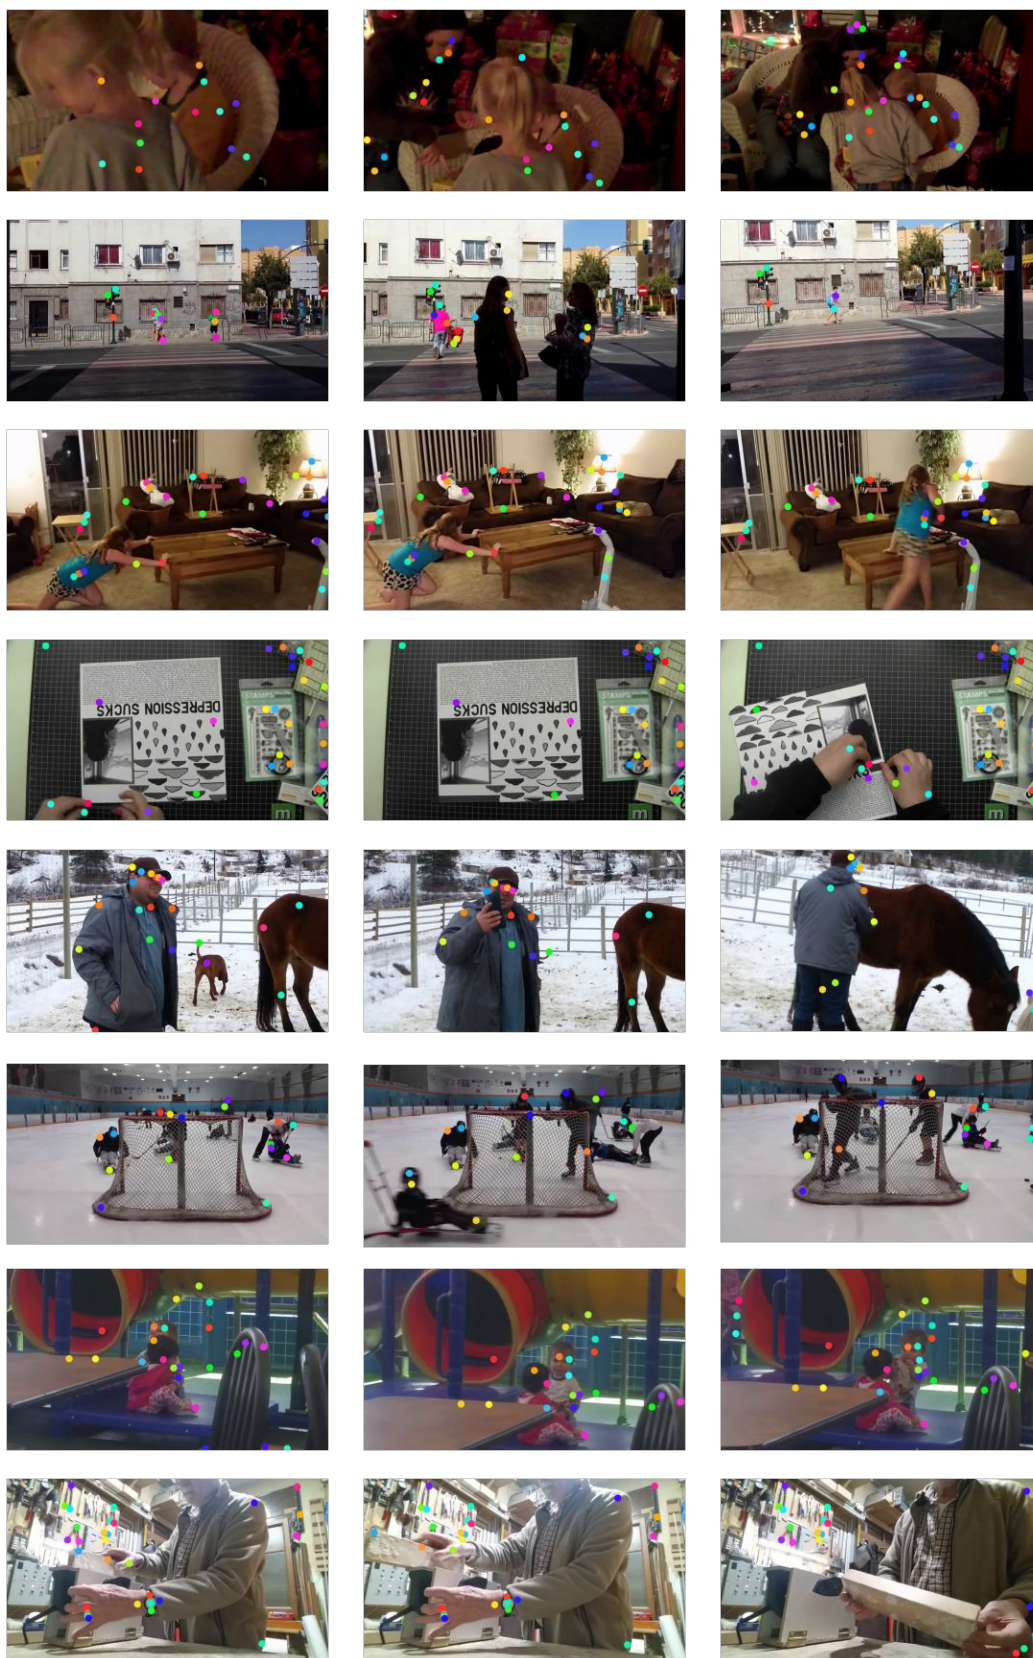

Figure 1: **Examples from TAP-Vid-Kinetics:** In this figure we show a few examples of TAP-Vid-Kinetics annotations with 3 frames per example.



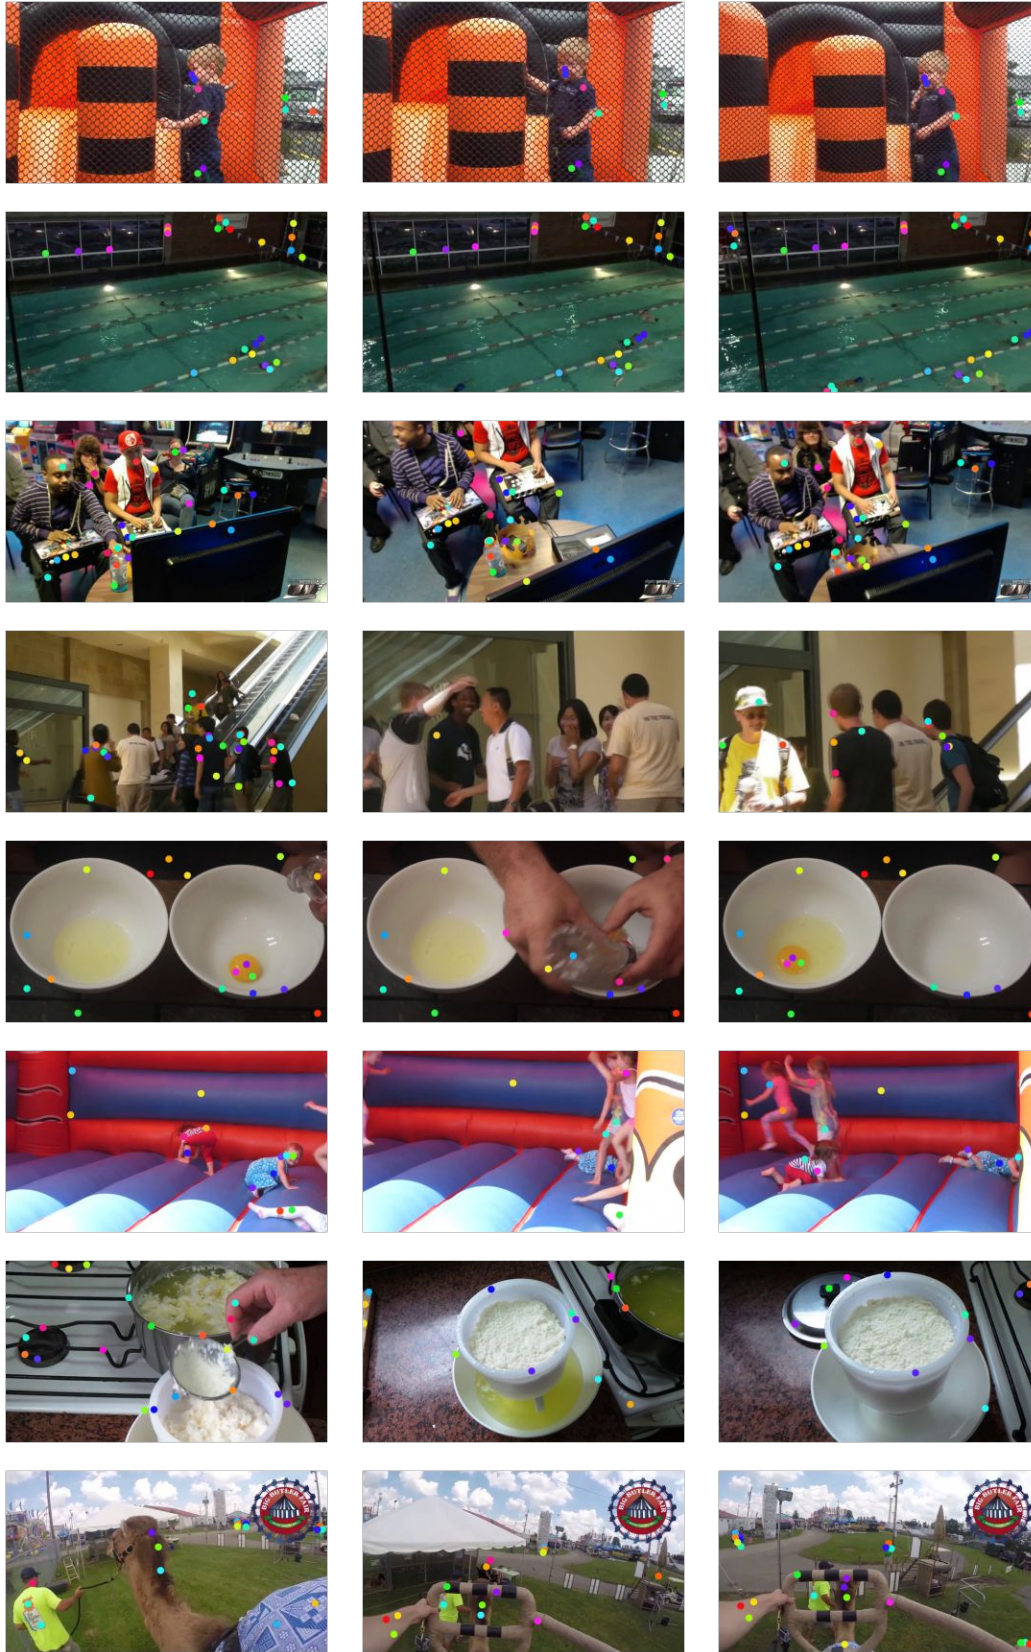

Figure 2: **Examples from TAP-Vid-Kinetics:** In this figure we show a few examples of TAP-Vid-Kinetics annotations with 3 frames per example.



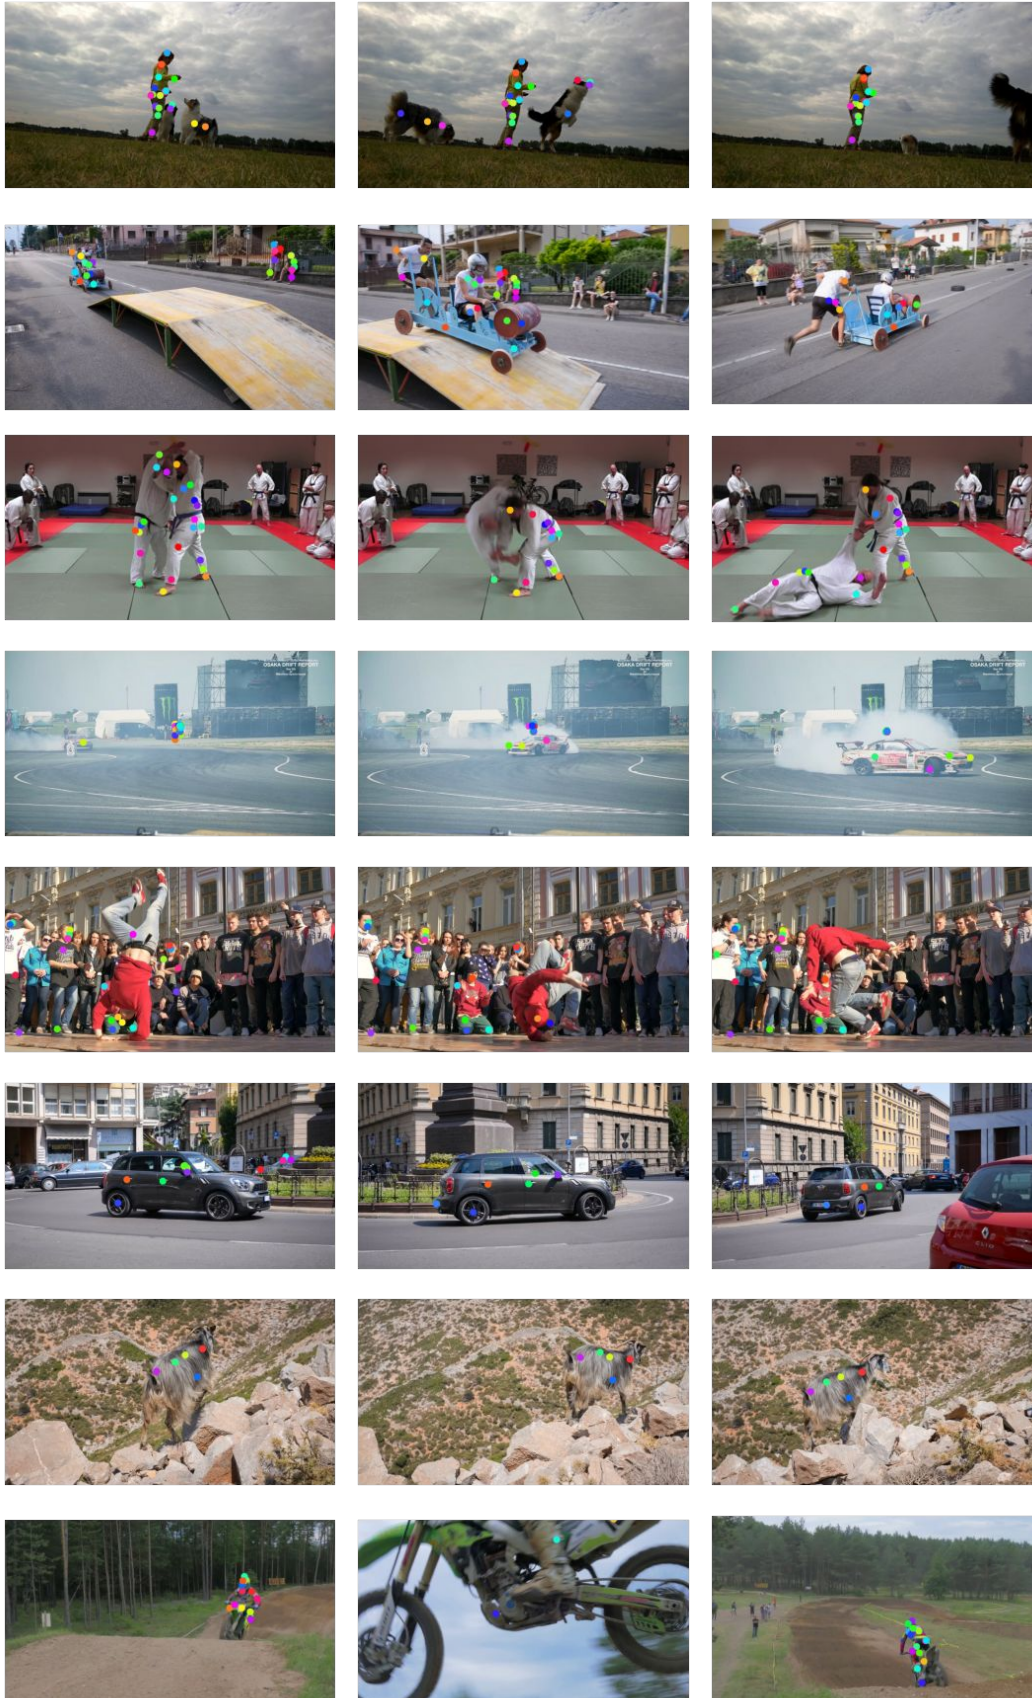

Figure 3: **Examples from TAP-Vid-Davis:** In this figure we show examples of TAP-Vid-Davis annotations with 3 frames per example.

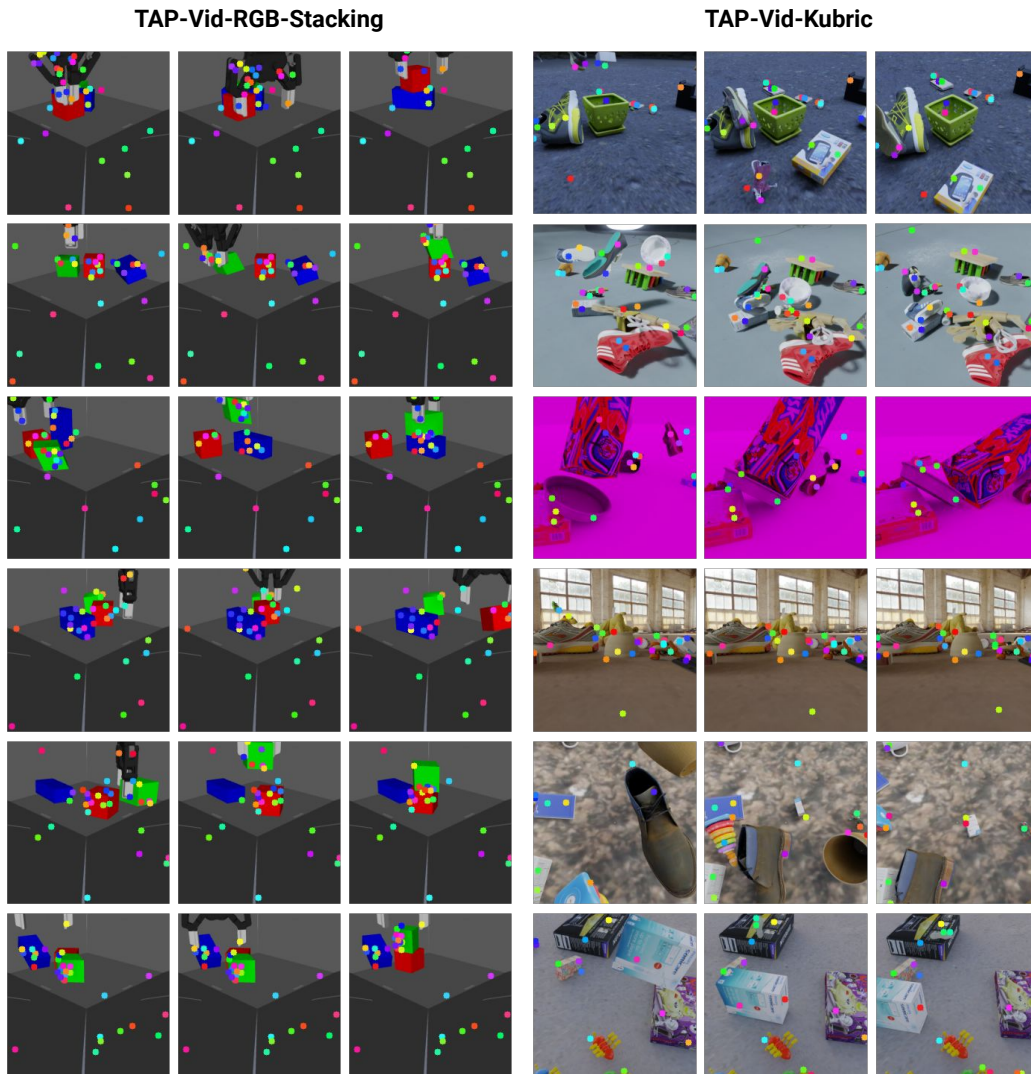

Figure 4: **Examples from TAP-Vid-Kubric and TAP-Vid-RGB-Stacking:** In this figure we show examples of TAP-Vid-Kubric and TAP-Vid-RGB-Stacking annotations with 3 frames per example.

1. View the video once. Choose a point that appears on the object (specified by the given bounding-box) for the very first time. Prefer locations such that the point marker plotted at the chosen location should have its center and periphery both completely inside the object region. Try to spread out the points on different parts and label them with part tags if possible (i.e., human hand, human head, car wheel etc.).
2. Find the last frame after which the point gets occluded (e.g., because the object moves outside of the frame) and end the track. Then if it becomes visible again, and start a new track to follow it under the same tag, repeating this process until the end of the video.
3. Wait for the optical flow assist algorithmic annotations to adjust based on the manual input. Once the algorithmic annotations are available, add manual annotations until the automated annotations are consistent with the schematic below:

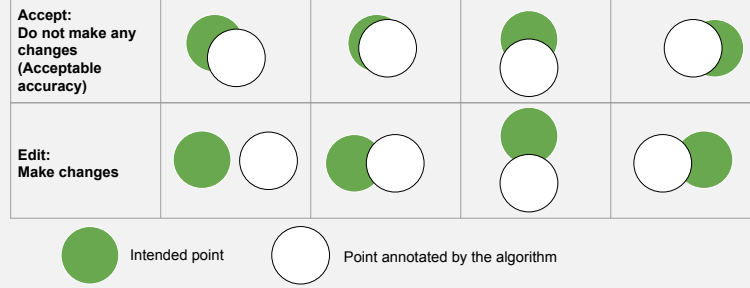

4. Go through the video again to identify any interpolated points in the un-annotated frames with obvious position errors. Correct the error by manually adding a point. Wait a few seconds for the assist algorithm to update the point tracks. Continue the process of reducing errors in the remaining un-annotated frames.
5. Once satisfied with the point track in all frames where it is visible, choose another point and repeat the process from the beginning.

Figure 5: **Representative annotator guidelines.** (Minor variations were used as we saw results and gave feedback).

can select (e.g., a specific object category etc.); hence, *any* point which the annotators can track reliably is admissible, resulting in a diverse set of point trajectories in the dataset. The annotators are encouraged to leverage the optical flow track assist algorithm to help improve their accuracy and productivity, although they have the option to turn it off if it’s not helpful, resulting in a fallback to linear interpolation. A visual representation of acceptable discrepancy between manual and automated point selections is provided to help the annotators decide when to intervene by adding another point.

## 4 Simulated Dataset Generation

For synthetic data, obtaining point tracks is conceptually straightforward, as the simulator typically knows the shape and position of all objects. However, most modern simulators don’t directly expose point tracks, so we must compute them. Since both Kubric and RGB-Stacking contain only rigid objects, we therefore obtain point tracks in the following manner. We first choose query points in pixel space, which ensures that the query is visible. Then we find the location of that point in the object’s local coordinate frame, using either coordinate maps (available for Kubric objects) or by back-projecting using the depth map and applying the inverse object transformation. Next, we compute the 3D location in world coordinates for every other frame using the known transformation of each object. Finally we project the point to the image plane. To compute occlusion, we compare the computed depth at the target frame with the depth map rendered from the simulator. Specifically, if the point is behind the depth map (the max depth of the 4 nearest pixels to the reprojected point) by a sufficient margin (1%), we mark it as occluded.

For Kubric, we sample exactly 256 query points from each video, and we try to have the same number of points for every object, including the background. However, this can lead to far too many points for very small objects, so we limit sampling to 0.16% of the total pixels on each object. There may then



not be enough pixels on the smallest objects to sample the same number for each object. Therefore, we sort objects by the number of pixels, and sample iteratively starting with the smallest: if there are  $K$  objects, and the smallest object has only  $P$  pixels, then we sample  $N$  pixels from this smallest object, where  $N = \lfloor \min(P * .0016, 256/K) \rfloor$ . Then we reduce 256 by  $N$ , reduce  $K$  by 1, and repeat until we’ve sampled points from all objects. This ensures the most balanced set of points possible without having too many points per object.

For TAP-Vid-RGB-Stacking, we sample exactly 600 query points uniformly from the first frame for each video and tracked them via the described method above throughout the video. Then we sample 30 points per video such that 20 of them are from moving objects (i.e. tracks with significant motion) and 10 points are from static objects/background (i.e. tracks with minimal or no motion).

## 5 Dataset Statistics: Agglomerative Clustering of Trajectories

To assess diversity of point motion in our annotations, we cluster the point trajectories in each labelled video (approx. 30 trajectories per video). Agglomerative clustering is performed starting with assigning each trajectory to an independent cluster and recursively merging the clusters until all the inter-cluster distance are greater than a threshold (set to 2 pixels). The cluster distance between two given clusters is the minimum distance between any two trajectories in the two clusters. The distance between trajectories is computed as the mean-centered Euclidean distance between non-occluded trajectory points; this distance is assumed to be undefined (i.e. not counted when comparing clusters) if there are less than 10 frames of overlap. Listing 1 gives a Python-pseudocode implementation of the above.

## 6 Quantitative Validation of the Human Annotation Procedure

### 6.1 Validation on Simulated Videos

While it is difficult to validate our annotation procedure on real data, we can easily do so on synthetic data where the ground truth is known. We annotate videos with length 2-seconds (24-frame) from the Kubric dataset [1], where we have known ground truth point tracks. Annotators are instructed to label 3 points on any object up to a maximum of 10 objects (up to 30 points per video). We instruct annotators to choose points which are visible in the first frame, and treat those as queries for computing ground truth tracks.

Because it is a graphics package, Kubric contains all the information required to obtain perfect ground-truth tracks for any point the annotators choose. We can compare the annotated tracks to the ground truth using the same metrics proposed in the original point tracking task.

To make the videos more representative of realistic annotation challenges, we simulate camera jitter (not present in MOVi-E), which is a common phenomenon in many real-world videos. We also increase the framerate from 12 FPS to 25, to match our real videos. All generated videos are included in our supplementary html files. Annotators are instructed to label 3 points on any object up to a maximum of 10 objects (up to 30 points per video). We can compare the annotated tracks to the ground truth. In both cases, annotation was performed at  $1024 \times 1024$  resolution, although the evaluation is still done at  $256 \times 256$  pixels to be consistent with our evaluation procedure. The most intuitive method is the fraction of points with error less than a given threshold, although for completeness we include all metrics proposed for evaluation.

Table 1 gives our full results, demonstrating the accuracy of our annotators given the optical flow track assist algorithm. Table 1 also compares results with and without the proposed optical flow track assist algorithm. We see non-trivial improvements in accuracy with the proposed tool, especially on the metrics emphasizing higher levels of precision: for instance, the error rate for pixels  $< \delta^1$  (2 pixels away) has been cut by almost half, and for  $< \delta^0$  (1 pixel away) it has increased by over 25% in absolute terms. This is true even though annotation was done much faster: time was reduced from 50 minutes per video to 36 minutes per video by using the OF track assist.

```

import numpy as np

def track_dist(t1, t2):
    vis = np.logical_and(t1.raw_vis, t2.raw_vis)
    if np.sum(vis.astype(np.float32)) <= 10:
        return float('inf')
    xy1 = t1.t_xy[vis]
    xy2 = t2.t_xy[vis]
    offset = np.mean(xy1 - xy2, axis=0, keepdims=True)
    xy2 = xy2 + offset
    dist = np.sqrt(np.sum(np.square(xy1 - xy2), axis=-1))
    return np.mean(dist)

def cluster_dist(c1, c2):
    min_dist = float('inf')
    for t1 in c1.children:
        for t2 in c2.children:
            d = track_dist(t1, t2)
            min_dist = min(d, min_dist)
    return min_dist

def all_dists(clusters):
    n = len(clusters)
    dists = np.zeros((n, n)) + float('inf')
    for i in range(n-1):
        c_i = clusters[i]
        for j in range(i+1, n):
            c_j = clusters[j]
            if c_i and c_j are not merged:
                dists[i, j] = cluster_dist(c_i, c_j)
    return dists

def greedy_cluster(xy, occ, dist_thresh=2/256):
    """
    Agglomerative trajectory clustering.

    xy: [N, T, 2] shaped batch of N trajectory coordinates.
    occ: [N, T] shaped batch of N trajectory occlusions.
    dist_thresh: float, distance threshold for merging clusters.
    """
    # initialize with one cluster per trajectory
    clusters = []
    for i in range(xy.shape[0]):
        clusters.append((xy[i], occ[i]))
    # compute all N×N pairwise trajectory distances
    dists = all_dists(clusters)
    while np.min(dists) < dist_thresh:
        min_ij = np.argmin(dists)
        i, j = np.unravel_index(min_ij, dists.shape)
        # merge trajectories i and j (impl omitted)
        ...
        # re-compute trajectory distances:
        dists = all_dists(clusters)
    return clusters

```

Listing 1: Agglomerative clustering of trajectories.



| method  | AJ   | $< \delta_{avg}^x$ | OA   | Jac. $\delta^0$ | Jac. $\delta^1$ | Jac. $\delta^2$ | Jac. $\delta^3$ | Jac. $\delta^4$ | $< \delta^0$ | $< \delta^1$ | $< \delta^2$ | $< \delta^3$ | $< \delta^4$ |
|---------|------|--------------------|------|-----------------|-----------------|-----------------|-----------------|-----------------|--------------|--------------|--------------|--------------|--------------|
| No OF   | 74.7 | 83.1               | 97.4 | 25.8            | 64.2            | 90.5            | 96.2            | 96.9            | 41.2         | 78.8         | 96.3         | 99.5         | 100.0        |
| With OF | 81.4 | 90.0               | 96.9 | 49.5            | 76.1            | 90.0            | 95.2            | 96.0            | 66.6         | 87.5         | 96.2         | 99.5         | 100.0        |

Table 1: Annotation accuracy with and without the optical flow track assist algorithm. Jac.  $\delta^x$  is the Jaccard metric measuring both occlusion estimation and point accuracy, with a threshold of  $\delta^x$ ; AJ is the Average Jaccard across  $x$  between 0 and 4.  $< \delta^x$  is the fraction of points not occluded in the ground truth for which the prediction is less than  $\delta^x$ , and  $< \delta_{avg}^x$  is the average across  $x$  between 0 and 4. Occlusion Accuracy is denoted with OA. We set  $\delta = 2$ .

| OA   | $< \delta^0$ | $< \delta^1$ | $< \delta^2$ | $< \delta^3$ | $< \delta^4$ |
|------|--------------|--------------|--------------|--------------|--------------|
| 95.5 | 51.8         | 78.3         | 92.5         | 98.7         | 100.0        |

Table 2: Inter-rater agreement on the same set of point tracks for DAVIS.  $< \delta^x$  is the fraction of points not occluded in the ground truth for which the prediction is less than  $\delta^x$ ,  $x$  between 0 and 4. We set  $\delta = 2$ . Occlusion Accuracy is denoted with OA.

## 6.2 Validation on Inter-Rater Agreement

We further conduct inter-human agreement studies on the DAVIS point track videos. For the total of 650 points in 30 videos, we select the first-frame points from the first round of annotation, and ask 2 human raters annotate the following frames for each point. We then compare the similarity between the 2 human annotations using our established metrics. Table 2 shows the human agreement results. On average, human on occlusion with 95.5% accuracy, and 92.5% on location with a 4 pixel threshold. Note that the metrics are evaluated under 256x256 resolution.

## 7 TAPNet Implementation and Analysis

We propose the first end-to-end deep learning algorithm we are aware of for tracking any point. The network takes a video and a set of query points as inputs and outputs full tracks. The critical component of our system is the *cost volume*, whereby features for a query point are compared to features at every other location in the video. We then apply a simple network on top of the cost volume at each frame to predict the position and occlusion.

### 7.1 Cost Volume

Any tracking problem involves comparing the query point to other locations in the video in order to find a match. Our approach is inspired by cost volumes [3, 13, 18], which have proven successful for optical flow. We first compute a dense feature grid for the video, and then compare the features for the query point with the features everywhere else in the video. Then we treat the set of comparisons as if it were a feature itself, and perform more neural network computation on top. Cost volumes can detect repeated patterns even when those patterns are unlike those seen in training. Unlike prior work, however, we compute an *multi-headed* cost volume, i.e., we compute multiple feature vectors for every spatial position, and concatenate the cost volumes for each. This gives us a richer feature for further processing.

Figure 6 shows the procedure. Given a video, we first compute a feature grid  $F$ , where  $F_{ijt}$  is a  $d$ -dimensional feature representing the image content at spatial location  $i, j$  and time  $t$ . For this, we use a TSM-ResNet-18 [12] with time shifting in only the first two layers, as we find that single-frame feature maps, and feature maps with a larger temporal footprint, tended to perform worse; see supplementary for details. This feature grid is broken into  $n$  heads along the channel axis, each of dimension  $d/n$ . Given a query point at position  $x_q, y_q$  and time  $t_q$ , we extract a feature to represent it from the feature grid  $F_t$  via bilinear interpolation on the grid, at position  $i_q, j_q, t_q$ . We call the extracted feature  $F_q$ . We then compute the cost volume as a matrix product: i.e., if each feature in the

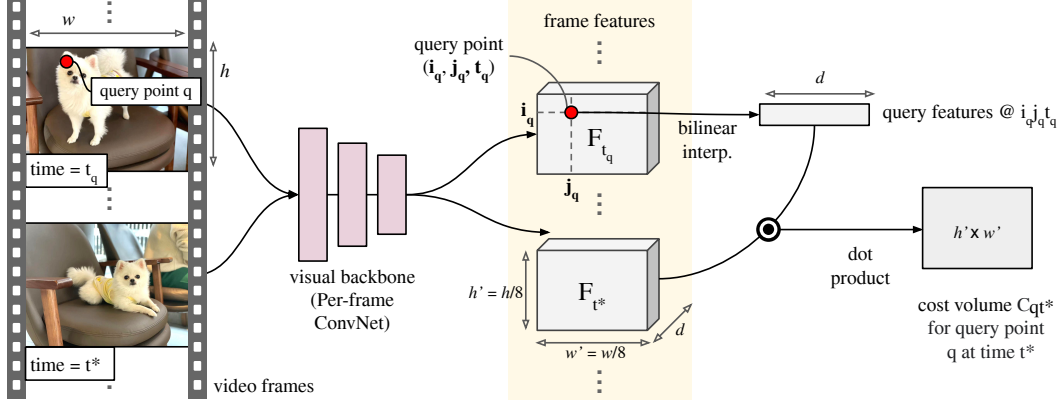

Figure 6: **Cost volume computation for a single query.** Features for all video frames are extracted using a per-frame ConvNet. Features for the given query point location  $(i, j)$  in the  $t_q$ -th frame are then obtained through 2D bilinear interpolation. The features are dotted with the spatial features from a different time  $t^*$  to obtain the corresponding cost volume.

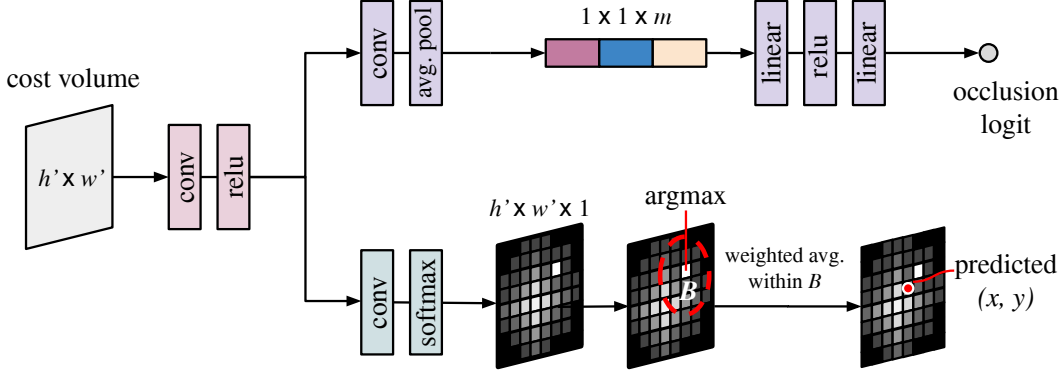

Figure 7: **Inferring position and occlusion from a cost volume.** The cost volume slice (for frame  $t^*$  and query  $q$ ) is fed into two branches: occlusion and coordinate regression. The occlusion branch collapses the spatial features through pooling before regressing a scalar occlusion logit. The point-regression branch collapses the channels through a Conv layer, applies a spatial softmax, and then applies a soft argmax (weighted average of grid-coordinates within a Euclidean ball  $B$ ).

feature map  $F$  is shape  $n \times (d/n)$ , then the output cost volume  $C_{qijt} = F_q^\top F_{ijt}$ . Thus,  $C_q$  can be seen as a 4-D tensor with  $n$  channels.

## 7.2 Track Prediction

The next step is to post-process the cost volume associated with the query point, which is done independently for each frame. The architecture for one frame is shown in Figure 7. After a first Conv+ReLU, we split into two branches: one for occlusion inference, and the other for position inference. In practice, we find that standard average pooling for occlusion estimation results in unstable training. Therefore, our occlusion branch uses a Conv (32 units), followed by spatial average pooling. This is followed by a linear layer (16 units), a ReLU, and another linear layer which produces a single logit.

For position inference, we apply a Conv layer with a single output, followed by a spatial softmax. This is followed by a soft argmax [9], which means computing the argmax of the heatmap, followed by a spatial average position of the activations within a radius around that argmax location.

Mathematically, let us assume that  $S_{qijt} \in \mathbb{R}$  is the softmax activation at time  $t$  and spatial position  $i, j$  for query  $q$ . Let  $G$  be a spatial grid, i.e.,  $G_{ij} \in \mathbb{R}^2$  is the spatial position of  $S_{ij}$  in image

coordinates. Finally, let  $(\hat{i}_{qt}, \hat{j}_{qt})$  be the argmax location of  $S_{qt}$ . Then we compute the output position as:

$$p_{qt} = \frac{\sum_{ij} \mathbb{1} \left( \|(\hat{i}_{qt}, \hat{j}_{qt}) - (i, j)\|_2 < \tau \right) S_{qijt} G_{ij}}{\sum_{ij} \mathbb{1} \left( \|(\hat{i}_{qt}, \hat{j}_{qt}) - (i, j)\|_2 < \tau \right) S_{qijt}} \quad (1)$$

$\tau$  here is a constant, typically equal to 5 grid cells. Note that some parts of this expression are not differentiable: notably the thresholding and the argmax. However, the gradients will still point in the right direction, as errors will typically cause the network to shift the overall mass of the softmax toward the ground truth location [9].

### 7.3 Loss Definition

Our loss for each query point then has the following form:

$$L(\hat{p}, \hat{o}, p^{gt}, o^{gt}) = \sum_t (1 - o_t^{gt}) L_H(\hat{p}_t, p_t^{gt}) - \lambda [\log(\hat{o}) o^{gt} + \log(1 - \hat{o})(1 - o^{gt})] \quad (2)$$

Here,  $L_H$  is the Huber loss [4].  $p^{gt}$  is the ground-truth position, and  $o^{gt}$  is a (binary) ground truth occlusion. That is, we treat position as a simple regression problem for frames where the point is visible. We use a Huber loss because we expect occasional large errors, and we don't want to penalize these excessively. For occlusions, the loss is a standard cross entropy.  $\lambda$  is the trade-off parameter.

### 7.4 Other Architectural Details

After computing the cost volume, we feed the output to a Conv layer with stride 1, a  $3 \times 3$  receptive field, and 16 hidden units, followed by a ReLU.

The occlusion branch takes this output and applies a convolution with stride 2,  $3 \times 3$  receptive field, and 32 hidden units. This is followed by average pooling, a linear layer with 16 hidden units, ReLU, and a final linear layer for output.

The prediction branch applies a Conv layer with stride 1,  $3 \times 3$  receptive field, and 1 hidden unit, which produces the input for the softmax, which is then used in the soft argmax above.

When computing the Huber loss, we first rescale both the prediction and ground truth coordinates to be in the range  $[-1, 1]$ . For each coordinate, we compute the Euclidean distance  $\|(\hat{x}_{qt}, \hat{y}_{qt}) - (x_{qt}^{gt}, y_{qt}^{gt})\|_2 = \sqrt{(x_{qt} - \hat{x}_{qt}^{gt})^2 + (y_{qt} - \hat{y}_{qt}^{gt})^2}$ . Then we apply a Huber loss with a threshold  $1/32$  (which corresponds to 4 pixels error in the  $256 \times 256$  images we train on). The Huber loss is scaled much smaller than the sigmoid cross entropy, so we set  $\lambda = 100$ .

Our TSM-ResNet-18 follows ResNet-18: i.e., it has no 'bottleneck' layers, so each residual unit is 2 convolutional layers with a  $3 \times 3$  spatial receptive field. Each 'layer' contains 2 units. It uses no temporal downsampling, meaning that each output has a temporal receptive field of 9 frames. The final output has 256 channels.

### 7.5 Training

We use a cosine learning rate schedule with a peak rate of  $2e^{-3}$  and 5,000 warmup steps. We train on 64 TPU-v3 cores with a batch size of 4 MOVIE 24-frame videos per core. Each model trains for 50,000 steps. We use an Adam optimizer with  $\beta_1 = .9$  and  $\beta_2 = .95$ . We also use weight decay of  $1e^{-2}$ , applied after the Adam rescaling (i.e. Adam-W). We use cross-replica batch norm in the ResNet/TSM-ResNet backbone, but don't use batch norm anywhere in or after the cost volume computation.

We performed minimal hyperparameter tuning by observing transfer performance primarily on DAVIS, tuning learning rate, model size, and optimizer parameters in separate sweeps. Each experiment requires roughly 24 hours. Roughly 25 full-scale experiments were required to arrive at the final model.



| Method         | AJ   | $< \delta_{avg}^x$ | OA   | Jac. $\delta^0$ | Jac. $\delta^1$ | Jac. $\delta^2$ | Jac. $\delta^3$ | Jac. $\delta^4$ | $< \delta^0$ | $< \delta^1$ | $< \delta^2$ | $< \delta^3$ | $< \delta^4$ |
|----------------|------|--------------------|------|-----------------|-----------------|-----------------|-----------------|-----------------|--------------|--------------|--------------|--------------|--------------|
| Full Model     | 46.6 | 60.9               | 85.0 | 11.3            | 31.6            | 53.3            | 65.8            | 71.2            | 19.8         | 46.4         | 69.3         | 81.7         | 87.4         |
| ResNet-18      | 46.0 | 60.7               | 85.8 | 9.6             | 29.5            | 52.7            | 66.2            | 71.9            | 17.6         | 45.0         | 69.8         | 82.8         | 88.6         |
| Full TSM       | 45.4 | 60.1               | 83.7 | 10.8            | 31.0            | 52.1            | 64.0            | 69.1            | 19.2         | 45.9         | 68.5         | 80.6         | 86.4         |
| No Soft Argmax | 45.8 | 59.0               | 84.6 | 10.4            | 30.8            | 52.6            | 64.8            | 70.2            | 18.2         | 44.8         | 67.4         | 79.1         | 85.3         |

Table 3: Ablation of the architectural choices for our model on TAP-Vid-Kinetics. ResNet-18 has no temporal receptive field in the backbone, whereas Full TSM uses time-shifting at every layer, giving a large temporal receptive field. No Soft Argmax replaces the soft argmax with a simple MLP.

| Query method | Kinetics |      |      | DAVIS |      |      | RGB-Stacking |      |      |
|--------------|----------|------|------|-------|------|------|--------------|------|------|
| Strided      | 46.6     | 60.9 | 85.0 | 38.4  | 53.1 | 82.3 | 59.9         | 72.8 | 90.4 |
| First        | 38.5     | 54.4 | 80.6 | 33.0  | 48.6 | 78.8 | 53.5         | 68.1 | 86.3 |

Table 4: Comparison of performance for the same output tracks, but with different query points. ‘First’ refers to using only the first visible point in each trajectory as a query, whereas ‘Strided’ means sampling multiple query points per trajectory at a stride of 5 frames.

## 7.6 Model Ablations

We next ablate our design decisions. For this, we use TAP-Vid-Kinetics, the largest and most realistic dataset available to us. We follow the same training setup as TAP-Net for all experiments.

We first ablate our backbone network. Recall that we use a TSM-ResNet-18, with shifting only in the first two layers. Thus we try TSM-ResNet-18, which uses time shifting at every layer, and ResNet-18, without time shifting. We also tried replacing the soft argmax operation with a 2-layer MLP regressor (128 hidden units, ReLU activations) that operates directly on the output heatmap.

We see that all of these changes harm the performance to some extent. Surprisingly, TSM-ResNet performs worse despite allowing the network to integrate across more frames; one possible interpretation is that it gives the network an opportunity to memorize motions in the Kubric dataset. On the other hand, giving no temporal information is also somewhat worse, particularly for the Average Jaccard metric (though not for occlusion estimation), suggesting that this method makes errors on occlusion estimation even when the location is correct and vice-versa. One possible interpretation is that with a small amount of temporal information, the network can do a better job of segmenting the object of interest, which allows the network to track and estimate occlusion for the body as a whole. Allowing this kind of reasoning while preventing memorization of motion patterns presents an interesting challenge for future research. The soft argmax is also important, possibly because it enforces that the network performs matching rather than memorizing motion patterns.

## 8 Query sampling strategies

Recall that our prediction algorithms take as input *query points*, which specify which point needs to be tracked. For most of this work, we assume that all points are treated equally: any point along a track may be sampled as a query. In practice, we sample queries in a *strided* fashion: every 5 frames starting at frame 0, we sample a query for every visible point. This means we may have multiple queries with the same target output trajectory. An alternative approach which is potentially relevant in an online setting is to start with the *first* frame where the point is visible, and track only into the future (during evaluation, we ignore the predictions for frames earlier than the query frame, as the algorithm can easily assume that these points are occluded, and we don’t want to encourage researchers to hardcode this). In practice, this setting is harder, because on average, the query frame will be farther from each output frame. However, we include both in order to facilitate comparisons with online methods. Table 4 shows the comparison for the three relevant datasets. Kubric is not included, as it uses a different, randomized sampling strategy detailed in the original paper [1]. Note that query sampling is a potential area of improvement for this dataset: some queries may be ambiguous if they are, e.g., behind translucent objects or very close to occlusion boundaries. However, we leave the problem of query sampling to future work.

| Method            | Kinetics    |                    |             | Kubric      |                    |             | DAVIS       |                    |             | RGB-Stacking |                    |             | JHMDB PCK   |             |
|-------------------|-------------|--------------------|-------------|-------------|--------------------|-------------|-------------|--------------------|-------------|--------------|--------------------|-------------|-------------|-------------|
|                   | AJ          | $< \delta_{avg}^x$ | OA          | AJ          | $< \delta_{avg}^x$ | OA          | AJ          | $< \delta_{avg}^x$ | OA          | AJ           | $< \delta_{avg}^x$ | OA          | @0.1        | @0.2        |
| Kubric only       | 46.6        | 60.9               | 85.0        | <b>65.4</b> | <b>77.7</b>        | <b>93.0</b> | 38.4        | 53.1               | 82.3        | 59.9         | 72.8               | <b>90.4</b> | 62.3        | 79.8        |
| Finetune Kinetics | <b>51.6</b> | <b>64.9</b>        | <b>90.4</b> | 59.9        | 73.1               | 90.8        | <b>41.5</b> | <b>56.0</b>        | <b>82.4</b> | <b>63.2</b>  | <b>74.7</b>        | 90.2        | 63.4        | 80.1        |
| Finetune JHMDB    | 36.4        | 58.6               | 71.3        | 51.4        | 69.9               | 83.9        | 31.6        | 49.0               | 77.0        | 53.0         | 69.1               | 90.9        | <b>71.3</b> | <b>87.7</b> |

Table 5: **TAP-Net performance after fine-tuning.** We see that fine-tuning on JHMDB harms performance on all datasets except JHMDB by a large margin, but finetuning on Kinetics improves performance on JHMDB, demonstrating the domain transfer properties of the TAP task when the dataset contains arbitrary points tracked on a diverse YouTube dataset. The highlight numbers show the gap specifically.

## 9 Implementation of the Comparison to JHMDB

Numerous prior methods which aim to benchmark class-agnostic point tracking do so using a dataset called JHMDB. These algorithms typically begin by training self-supervised point tracking algorithms in a class-agnostic manner, and then applying them directly to JHMDB in a semi-supervised manner: joint locations are given on the first frame, and the algorithm must track them over time. The popularity of JHMDB used in this way [5, 7, 8, 10, 15–17] underscores the demand for point tracking evaluations in the literature.

However, JHMDB provides ground truth locations exclusively for human joint locations, which are not points on the surface of objects, but rather *inside* them. This means that tracking based on appearance alone is poorly defined (algorithms must somehow infer the depth of the points beneath the surface). Furthermore, it gives advantages to algorithms that are biased toward humans, ignoring common cases in robotics where the surfaces of inanimate objects must be tracked. In this section, we aim to show the limitations of using JHMDB for class-agnostic point tracking by showing that the dataset isn’t as general as TAP-Vid. Specifically, we will train a straightforward model (TAPNet) on TAP-Vid and demonstrate that it can improve class-agnostic tracking on JHMDB (resulting in SOTA performance on this dataset). However, training on JHMDB actually *harms* tracking on TAP-Vid, as it ignores many important cases of point tracking.

We take the full model pretrained on TAP-Vid-Kubric and fine-tune using the same settings on both Kinetics and JHMDB. For simplicity, we use no data augmentation on either dataset; both datasets are resized to  $256 \times 256$ . We sample 128 queries from each video uniformly at random from all possible queries (unoccluded tracked points), and feed the corresponding tracks as training examples. We train with 1 video per TPU core, and otherwise use the same training setup as for training on Kubric (64 TPU-v3 cores, Adam optimizer), but we train for only 5000 steps (100 warmup steps followed by a cosine schedule) with a much smaller learning rate of  $1e-5$  (otherwise the network overfits badly to the relatively small number of points). For JHMDB, we fine-tune on the full train+val dataset, but we evaluate (after Kinetics fine-tuning) on only the JHMDB val-set in order to be comparable with prior results in the literature.

Table 5 shows the performance across all datasets with and without finetuning. Not that we’re particularly interested in transfer (salmon-colored rows); i.e., it’s not surprising that performance on Kinetics is best for the model finetuned there, and same for JHMDB, as we train on the evaluation images for both. However, what’s interesting is that our full model obtains 62.3 PCK@0.1 and 79.8 PCK@0.2 on JHMDB when trained only on Kubric, but 63.4 PCK@0.1 and 80.1 PCK@0.2 after finetuning on Kinetics. However, the model finetuned on JHMDB obtains  $58.6 < \delta_{avg}^x$  on Kinetics, and 36.4 Average Jaccard, versus 46.6 and 60.9 respectively training purely on synthetic data. Note the loss of performance on occlusion accuracy and Average Jaccard are perhaps not so surprising, as JHMDB contains no information about occlusion (the evaluation assumes that points which are unoccluded in the first frame are unoccluded in all frames, and we train on all such points). However,  $< \delta_{avg}^x$  ignores occlusion, and TAP-Net is still substantially worse with JHMDB finetuning than without it. We see a consistent downtrend in  $< \delta_{avg}^x$  (and average Jaccard) throughout training for all datasets, suggesting that this is not merely an issue of overfitting, but rather a fundamental problem with the JHMDB dataset.

## 10 Baselines

**Kubric-VFS-Like** We first evaluate a point tracking algorithm inspired by VFS [17] released as part of Kubric [1], and the only algorithm which can be applied directly to our setup. This algorithm uses a contrastive loss to learn features, contrasting points along the trajectory with points off of the trajectory. At test time, this algorithm computes dot products between the query features and the features at every other frame, before applying a spatial soft argmax similar to the one described in equation 1 for each frame. It finally estimates occlusion via cycle consistency: i.e., by computing correspondence backward from the target frame to the query frame, and seeing if the correspondence is the same. Note that our metrics don't exactly match those from the original paper [1]; the codebase is the same, but we used a ResNet-18 backbone to match this paper, and unlike the original work, we include the query points in the evaluation. We ran each evaluation on an internal V100 GPU; the full set took approximately 1 hour to run.

**RAFT** [14] This algorithm performs near state-of-the-art for optical flow estimation, i.e., tracking points between individual frames. We extend this to multiple frames by integrating the flow from the query point: i.e., we use bilinear interpolation of the flow estimate to update the query point, and then move to the next frame and repeat. If the point is outside the frame, we use the flow value at the nearest visible pixel. While RAFT is extremely accurate over short time scales, this approach has some obvious problems with long time scales. First, it provides no simple way to deal with occlusions (we simply mark points as occluded if they're outside the frame). Furthermore, it has no way to recover from errors, so slight inaccuracies on each frame tend to accumulate over time even when the point remains visible. Experiments were on an internal V100 GPU and took approximately 24 hours.

**COTR** [6] Like RAFT, COTR operates on pairs of images; however, it was designed to handle substantially more motion between images. The underlying architecture uses a transformer to find global scene alignment, followed by more local refinement steps to ensure high accuracy. It is trained on MegaDepth [11], which contains real-world scenes and uses reconstruction to get ground-truth correspondence. Due to this robustness, we use a different strategy from RAFT to apply COTR to videos: we compare the query frame to every other frame in the video, and find correspondences directly. COTR has no simple mechanism for detecting occlusions, so we apply the cycle-consistency strategy proposed in Kubric-VFS-Like: given correspondences between the query and target frame, we take the points in the target frame and find their correspondence in the query image. If the distance to the original query is greater than 48 pixels, we mark the point as occluded. Note that it's very expensive to run the model in this way: if there's queries on every frame, then we need to run COTR on every frame pair. Each pair takes 1 second with 30 points. Thus, for evaluation, we simplify our benchmark and take only queries from a single frame; thus these numbers are not precise, but good enough to get an idea of COTR's performance on our benchmarks. Experiments were on a GCP machine with 4 A100 GPUs and required approximately 20 hours.

**PIPs** [2] We ran Persistent Independent Particles (PIPs) following the "chaining" workflow, as the bulk of the algorithm is intended to operate on 8-frame segments. PIPs extracts features for both the query point and the rest of the video using a ConvNet, similar to TAP-Net. With the chaining workflow, tracks on each segment are estimated one-by-one, with the final point of each segment used to initialize the subsequent segment. Given an initial position estimate for a segment, it refines both the query features and the output trajectory using an MLP-Mixer applied iteratively. Similar to TAP-Net, the input for this refinement network includes the dot product between the query features and the features in the other frames, although in the case of PIPs, the dot products come from a local neighborhood around the spatial position estimate. The initial spatial position for each 8-frame chunk is the last spatial position that the point was estimated to be visible. As PIPs operates only forward in time, we run it twice for each query point: once forward, and once backward in time. Otherwise, we run the algorithm without modification, directly using its visibility estimates with a threshold of 0.5 to estimate occlusion. We found that the chaining algorithm requires more than 30 minutes to process a 250-frame video at  $256 \times 256$  resolution, meaning that we only had time to run on 167 random Kinetics videos before the deadline. Unlike for COTR, however, these results use all points available in each video. Experiments were run on a GCP machine with 1 V100 GPU and required approximately 100 hours.



## 11 Semantic analysis

Although our dataset is not intended for classification, it is useful to consider the distribution of labeled objects to understand performance. While DAVIS and RGB-stacking are small enough for the object distribution to be observed qualitatively, for Kinetics, we had annotators explicitly label the boxes before adding points. This process was informal, and we don't control for duplicates or typos; nevertheless, we show the full list of labels as well as their frequencies in Tables 6–9. We see a large variety of objects, although unsurprisingly for Kinetics, they tend to be people, clothing, and moving objects that are relevant for human actions, across indoor and outdoor, as well as several types of animals. We manually broke these into broader categories, and found 26.1% are on humans, 23.4% on clothing (on or off the body), and 50.4% are on other types of objects. This is consistent with the instructions (to target moving/foreground objects), and we believe it makes the dataset relevant for agents interacting with humans and performing tasks in human environments.

|                |                      |                       |                              |                           |
|----------------|----------------------|-----------------------|------------------------------|---------------------------|
| person:7012    | flexi:9              | hacksaw:3             | lady:3                       | cleaning brush:3          |
| shoe:842       | mini car:9           | statue table:3        | black curtain:3              | sleeveless:3              |
| pant:833       | plant pot:9          | dried palm leaves:3   | electric pencil sharpner:3   | strap:3                   |
| tshirt:796     | cat:9                | blue blanket:3        | white jacket:3               | aquarium:3                |
| object:614     | weight plate:9       | blue mat:3            | flowers:3                    | green grill:3             |
| shirt:608      | musical instrument:9 | steel tap:3           | window sheet:3               | tumbler:3                 |
| hand:542       | clock:9              | silver foil:3         | floor mat:3                  | arrow holder:3            |
| car:447        | comb:9               | toy train tracker:3   | decor:3                      | roll:3                    |
| short:413      | paper roll:9         | gas:3                 | frame stand:3                | elastic band:3            |
| t shirt:412    | ac:9                 | plastic plate:3       | wash basin:3                 | welding machine:3         |
| cap:377        | roller:9             | sledge:3              | bathub:3                     | cotton box:3              |
| chair:372      | lamp light:9         | mini trampoline:3     | showcase plant:3             | steel rods:3              |
| box:370        | screw tighter:9      | pendant:3             | spinning top:3               | white scooter:3           |
| table:347      | garland:9            | snake:3               | hook:3                       | propane fueling station:3 |
| bottle:310     | tower:9              | face cream:3          | wall hanger:3                | blue scooter:3            |
| jacket:247     | black coat:9         | headphone:3           | mining helmet:3              | hanging handle:3          |
| helmet:235     | plastic item:9       | violin stick:3        | color box:3                  | wall decor:3              |
| ring:223       | barrier:9            | circular frame:3      | sleeve dress:3               | thermocool:3              |
| light:215      | tree pot:9           | skiers:3              | crocodile:3                  | green bag:3               |
| watch:214      | crown:9              | system:3              | christmas tree:3             | machine part:3            |
| bowl:209       | chess piece:9        | paint spray machine:3 | white tray:3                 | wood object:3             |
| cloth:207      | bedsheet:9           | iron grill:3          | helmate:3                    | screwdriver:3             |
| glove:186      | wrist band:9         | marker pen:3          | red shirt:3                  | concrete fire bowl:3      |
| machine:186    | pencil:9             | yarn:3                | right hand:3                 | side pin:3                |
| bag:176        | glouse:9             | plastic glass:3       | streetlight:3                | whistle:3                 |
| pole:167       | yacht:9              | glass bowl:3          | trumpet:3                    | icebreaker:3              |
| toy:163        | wall poster:9        | p:3                   | whiper:3                     | sushi food:3              |
| plate:158      | headphones:9         | pouch:3               | shaving razor:3              | plaster roller:3          |
| spects:150     | red button:9         | mic stand:3           | golfstick:3                  | gift wrap:3               |
| ball:147       | blue tshirt:9        | car cover:3           | banner stand:3               | plaster:3                 |
| frame:147      | lantern:9            | staff:3               | flex:3                       | blue cover:3              |
| wood:140       | black short:9        | chips:3               | bean bag:3                   | spects frame:3            |
| door:139       | wood board:9         | handband:3            | egg:3                        | snow scooter:3            |
| dress:138      | black top:9          | snow bike:3           | holdingbelt:3                | switch box:3              |
| paper:135      | bat:9                | bed cot:3             | air pump machine:3           | man hole:3                |
| glass:132      | photographer:9       | yellow belt:3         | blue barrel:3                | embroidery hoop ring:3    |
| vehicle:132    | jug:9                | shark:3               | dumbell:3                    | staple puller:3           |
| stick:119      | wood block:9         | plastic box:3         | broom stick:3                | cutting plier:3           |
| sofa:117       | wind cart:9          | luggage bag:3         | right gloves:3               | clothes tub:3             |
| coat:115       | electric pole:9      | double tape:3         | plunger:3                    | black bucket:3            |
| window:114     | instrument:9         | decoration light:3    | western toilet seat:3        | clothes bag:3             |
| board:108      | light stand:9        | baw:3                 | cutting machine:3            | silver stick:3            |
| rod:105        | flying disc:9        | refrigerator:3        | pallet:3                     | wooden roller:3           |
| rope:102       | vacuum cleaner:9     | teeth braces:3        | black dress:3                | support board:3           |
| stand:97       | oil bottle:9         | side mirror:3         | blade:3                      | metal water pipe:3        |
| tool:93        | mouse:9              | tool box:3            | meat pieces:3                | paper sheet:3             |
| knife:92       | weight lift:9        | machinery equipment:3 | groove machine:3             | automatic door operator:3 |
| flag:92        | watermelon:9         | cable:3               | white short:3                | chef cap:3                |
| pipe:91        | zip:9                | putty plate:3         | measuring tape:3             | green apple:3             |
| bucket:91      | fish:9               | coupling pipe:3       | baby boy:3                   | petrol holder:3           |
| band:86        | cleaner:8            | stairs:3              | wooden spoon:3               | car petrol cap:3          |
| mat:84         | card shelf:8         | neck support:3        | white pad:3                  | petrol pipe:3             |
| right hand:81  | cushion:8            | glass object:3        | black cup:3                  | orange light:3            |
| brush:79       | bandage:8            | gear shifter:3        | red block:3                  | white light:3             |
| curtain:76     | red box:8            | drilling machine:3    | shield:3                     | red light:3               |
| thread:75      | black t shirt:8      | hinge:3               | electric stove:3             | car bumper:3              |
| hat:75         | red ball:8           | door engis:3          | streeing:3                   | dumbbell plate:3          |
| book:75        | wooden board:8       | goal post:3           | metal chrome polish bottle:3 | flex banner:3             |
| left hand:74   | carpet:8             | fedlight:3            | exhaust pipe:3               | podium:3                  |
| chain:74       | mixer:7              | yellow bucket:3       | wooden staircase:3           | baby mattress:3           |
| dog:72         | spatula:7            | wood bench:3          | ladder stand:3               | wood tray:3               |
| mirror:72      | fire extinguisher:7  | paino:3               | bubble bottle:3              | sharpner:3                |
| horse:72       | googles:7            | western top:3         | scrubber:3                   | tissue box:3              |
| belt:70        | tile:7               | black item:3          | water sprinkler:3            | brown sheet:3             |
| wire:70        | bottle cap:7         | coconut:3             | chandelier:3                 | cup board:3               |
| hand band:63   | carry bag:7          | green mat:3           | cot:3                        | fruits:3                  |
| socket:63      | wall clock:7         | art sheet:3           | pumpkin piece:3              | snow lifter:3             |
| cover:62       | straightener:6       | blue egg:3            | bucket:3                     | wood cutting machine:3    |
| button:61      | key:6                | pink basket:3         | exercise suit:3              | wood box:3                |
| cycle:60       | elephant statue:6    | yellow egg:3          | watermelon piece:3           | snow toy:3                |
| goggles:58     | specs:6              | dog sofa:3            | torch light:3                | vaccum pipe:3             |
| bike:58        | bridge:6             | left gloves:3         | leather hand band:3          | carry baby bag:3          |
| handle:56      | yoga mat:6           | green button:3        | hoop hula:3                  | straw:3                   |
| photo frame:55 | mattress:6           | suitcase:3            | rings:3                      | pink jacket:3             |
| speaker:55     | plastic bowl:6       | light lamp:3          | white hoody:3                | mitten:3                  |
| spectacles:55  | black pant:6         | car engine:3          | soap bubble sticks:3         | pepper crusher:3          |

Table 6: **Full list of object categories named by annotators in TAP-Vid-Kinetics.** Number of points per category is listed next to the category.

|                 |                    |                           |                          |                     |
|-----------------|--------------------|---------------------------|--------------------------|---------------------|
| basket:54       | green rope:6       | injector pipe:3           | white item:3             | oil container:3     |
| poster:54       | flower:6           | tube:3                    | pagdi:3                  | mug jar:3           |
| mike:53         | wooden pole:6      | desktop:3                 | wooden mud pot:3         | wafer:3             |
| pot:53          | basketball board:6 | support rod:3             | tyrecap:3                | orange rope:3       |
| girl:52         | cutting player:6   | machine tool:3            | black paper:3            | paint bottle:3      |
| mobile:51       | wall:6             | woolen thread:3           | right ring:3             | table cover:3       |
| boy:51          | paper rocket:6     | weaving needle:3          | left bracelet:3          | dolpin:3            |
| switch board:51 | rolling mat:6      | trolley:3                 | guitar box:3             | railing bridge:3    |
| packet:51       | doughnut:6         | brown bricks:3            | baby chair:3             | ice box:3           |
| ear ring:48     | washing machine:6  | train toy:3               | refridgerator:3          | cold jar:3          |
| top:47          | clothes:6          | chisel:3                  | string:3                 | black rod:3         |
| right shoe:46   | motorcycle:6       | orange pencil:3           | food packet:3            | net holder:3        |
| spoon:46        | scooter:6          | white marble:3            | swim glasses:3           | exercise ball:3     |
| bed:46          | left glove:6       | paper punch:3             | traning fin:3            | big basket:3        |
| cup:45          | jack:6             | papers:3                  | scuba diving fins:3      | ash shirt:3         |
| tyre:45         | blue jacket:6      | backpack:3                | hookah pipe:3            | wooden base:3       |
| card:45         | red bag:6          | knife box:3               | lorry:3                  | hair straightener:3 |
| pan:44          | rim:6              | phone mount:3             | chopping board:3         | blue board:3        |
| equipment:43    | chimney:6          | ornament:3                | cake piece:3             | cement brick:3      |
| apple piece:42  | sandle:6           | motor switch:3            | steel plate:3            | pompoms:3           |
| boat:42         | speedometer:6      | seat cover:3              | decorative:3             | gift box:3          |
| hair band:42    | wind gong:6        | sign:3                    | painting board:3         | exam pad:3          |
| jar:42          | nut:6              | milk box:3                | key hole:3               | wooden floor:3      |
| hoodie:41       | number plate:6     | mixer grinder:3           | glass pipe:3             | stretcher:3         |
| net:40          | blue joystick:6    | steel net:3               | frock:3                  | powered parachute:3 |
| tray:40         | swim suit:6        | white bricks:3            | music instrument plate:3 | ring box:3          |
| guitar:40       | stage:6            | blue button:3             | crash cymbal:3           | stopper cone:3      |
| left shoe:40    | tire:6             | white machine:3           | card door lock:3         | gas stove:3         |
| stool:39        | digging tool:6     | glass bottle:3            | selfie stick:3           | wheel barrow:3      |
| kid:39          | ribbon:6           | carrot piece:3            | banana:3                 | wax strip:3         |
| wheel:39        | steel table:6      | wing screw:3              | basketball hoop:3        | router box:3        |
| bracelet:39     | animal:6           | microphone stand:3        | filmy equipment:3        | small tin:3         |
| parachute:38    | binding rod:6      | sand tray:3               | wooden pad:3             | pipe slide:3        |
| mic:37          | steel rod:6        | brown pant:3              | hand towel:3             | ear stud:3          |
| scissor:36      | necklace:6         | extinguisher:3            | water jug:3              | shorts:3            |
| stone:36        | rightshoe:6        | coke bottle:3             | plates:3                 | barbell rod:3       |
| socks:35        | hipbelt:6          | purse:3                   | mud remover:3            | score card:3        |
| pillow:35       | display:6          | tripod:3                  | leaves:3                 | baseball bat:3      |
| television:35   | inner wear:6       | ridge gourd:3             | swim fin:3               | id card:3           |
| rock:35         | log:6              | costume:3                 | paint spray:3            | black grill:3       |
| slipper:35      | metal sheet:6      | ridge gourd piece:3       | chain locket:3           | music instrument:3  |
| camera:34       | utensil:6          | pink shirt:3              | ceiling ac vents:3       | pad plates:3        |
| apple:34        | cucumber:6         | cable roller:3            | pink object:3            | pool bridge:3       |
| pen:33          | wall frame:6       | airtrack:3                | mike stand:3             | air meter:3         |
| monitor:33      | goal:6             | nose ring:3               | baby crib:3              | swimming item:3     |
| child:33        | diving shoe:6      | steel tray:3              | wooden stool:3           | eyebrow pencil:3    |
| house:33        | duster:6           | igloo house:3             | metal wall design:3      | eye lash shaper:3   |
| bolt:33         | time adjuster:6    | wooden table:3            | brake:3                  | curling machine:3   |
| tub:33          | white bin:6        | vechile:3                 | rubber:3                 | kids play slide:3   |
| towel:33        | bus:6              | blue short:3              | pad stand:3              | plastic ring:3      |
| black object:33 | wooden cupboard:6  | yellow tshirt:3           | round table:3            | pink tshirt:3       |
| jeans:32        | play card:6        | green short:3             | fruit basket:3           | water skater:3      |
| cupboard:32     | hairclip:6         | woodframe:3               | mike transmitter:3       | sand machine:3      |
| tie:30          | charger:6          | cock:3                    | silver nut:3             | extension socket:3  |
| statue:30       | swim cap:6         | mannequin:3               | water pot:3              | paint tube:3        |
| baby:30         | trolley:6          | soft boat:3               | yellow bowl:3            | cotton cake box:3   |
| bangle:30       | clay:6             | fire stand:3              | snow shovel:3            | weight:3            |
| red object:29   | wooden bar:6       | yellow handle:3           | book rack:3              | round comb:3        |
| lamp:29         | blue jeans:6       | stroller:3                | white pipe:3             | creddle:3           |
| white box:28    | signboard:6        | back wheel:3              | black stand:3            | glass plate:3       |
| sheet:28        | bread piece:6      | shell:3                   | fire wood:3              | water safety:3      |
| hammer:28       | brown object:6     | beanie:3                  | small girl:3             | cake plate:3        |
| dustbin:27      | white cap:6        | yellow rope:3             | chess board:3            | white stool:3       |
| bicycle:27      | dumble:6           | iron handler:3            | pink box:3               | hair roller:3       |
| laptop:27       | wooden chair:6     | mushroom:3                | pink book:3              | dish wash bottle:3  |
| holder:27       | potted plant:6     | strings:3                 | meat:3                   | solar board:3       |
| bench:27        | head cap:6         | wick:3                    | helicopter:3             | screw holder:3      |
| candle:27       | red thread:6       | black board:3             | statue head:3            | nail polish:3       |
| needle:27       | measuring tool:6   | black half sleeve shirt:3 | finger cap:3             | paper packet:3      |

Table 7: Full list of object categories named by annotators in TAP-Vid-Kinetics, continued.



|                  |                            |                     |                              |                          |
|------------------|----------------------------|---------------------|------------------------------|--------------------------|
| ladder:26        | shoe rack:6                | oxygen tank:3       | steel item:3                 | peeler:3                 |
| phone:25         | white block:6              | toy track:3         | girl dress:3                 | oil tub:3                |
| sign board:25    | glass jar:6                | purple jacket:3     | short pant:3                 | locker:3                 |
| tree:25          | food:6                     | fuel can:3          | surfboard:3                  | water can:3              |
| dumbbell:25      | painting:6                 | match stick:3       | drum plate:3                 | support stand:3          |
| rack:25          | baby bed:6                 | pink top:3          | door closer:3                | white band:3             |
| bow:24           | orange:6                   | footwear:3          | wood plank:3                 | dust bin:3               |
| photo:24         | orange slice:6             | stove stand:3       | gear:3                       | pine apple:3             |
| mascara:24       | giraffe:6                  | white flower:3      | plastic knob:3               | white blind:2            |
| doll:24          | sheep:6                    | tape dispenser:3    | wooden rack:3                | right sock:2             |
| fan:24           | metal candle cup:6         | balloon toy:3       | snowman:3                    | sketch:2                 |
| tap:24           | glass table:6              | ballon:3            | wind instrument:3            | pink thread:2            |
| gloves:24        | tomato:6                   | supporter:3         | safety cap:3                 | filter:2                 |
| cutter:24        | steel object:6             | aeroplane:3         | window glass:3               | saddle:2                 |
| earring:24       | stainer:6                  | pineapple:3         | dash board:3                 | stethoscope:2            |
| sweater:23       | projector:6                | pink bin:3          | electric engraving machine:3 | foam:2                   |
| cake:21          | steel box:6                | cards:3             | wood stand:3                 | white cardboard:2        |
| blue cloth:21    | white strip:6              | right indicator:3   | orangestool:3                | hinges:2                 |
| spray bottle:21  | sponge:6                   | left indicator:3    | calender:3                   | saddle rope:2            |
| dolphin:21       | door handle:6              | match box:3         | blinds:3                     | news paper:2             |
| sticker:21       | blue top:6                 | broom:3             | vaccum machine:3             | doormate:2               |
| balloon:21       | head scarf:6               | roti maker:3        | game equipment:3             | bull ride:2              |
| fence:21         | cradle:6                   | cleaning machine:3  | game board:3                 | pineapple slice:2        |
| drum:21          | light pole:6               | cabin:3             | coolent box:3                | box cap:2                |
| steering:21      | head band:6                | card board:3        | funnel:3                     | grinder:2                |
| banner:21        | boxing bag:6               | food box:3          | infuser:3                    | bracelette:2             |
| fork:21          | cd box:6                   | pricetag:3          | bike delivery box:3          | wind manipulator:2       |
| block:21         | wardrobe:6                 | stamps:3            | carrot:3                     | underwear:2              |
| screw:21         | door lock:6                | gum tube:3          | wooden pot:3                 | white napkin:2           |
| tin:21           | woman:6                    | number sheet:3      | showpiece:3                  | robot toy:2              |
| black box:21     | rubber band:6              | roughfile:3         | stainless steel water jug:3  | mobile holder:2          |
| yellow object:20 | dish:6                     | label:3             | cigarette pipe:3             | oxygen pumping machine:2 |
| berry:20         | piano:6                    | softdrink tin:3     | bluetooth:3                  | gym bench:2              |
| fridge:20        | train:6                    | arrow:3             | watering pipe:3              | tennis bat:2             |
| white board:20   | scale:6                    | foot:3              | radio:3                      | red rod:2                |
| blue shirt:20    | gear rod:6                 | yellow short:3      | decor light:3                | green pant:2             |
| stove:20         | slide:6                    | dressing table:3    | disco light:3                | orange shirt:2           |
| remote:20        | water bottle:6             | cristmas tree:3     | music box:3                  | violet dress:2           |
| oven:19          | mixer jar:6                | jumping castle:3    | drum stick:3                 | left handle:2            |
| napkin:19        | yellow thread:6            | machine top:3       | music plate:3                | flower balloons:2        |
| hanger:18        | machine rod:6              | bike mirror:3       | bell plate:3                 | yellow button:2          |
| potato:18        | wool:6                     | front shield:3      | windgong:3                   | frontwheel:2             |
| steel:18         | battery box:6              | swim board:3        | air pump:3                   | black band:2             |
| white object:18  | microphone:6               | torch:3             | spading stick:3              | watertin:2               |
| vest:18          | iron sheet:6               | bra pad:3           | pool lane rope:3             | pertson:2                |
| tissue:18        | thread bundle:6            | bra tag:3           | bee box:3                    | vehcile:2                |
| cow:18           | black button:6             | sewing machine:3    | steel glass:3                | hanging light:2          |
| skate board:18   | car seat:6                 | blue object:3       | tea pot:3                    | fishing stick:2          |
| lighter:18       | white t shirt:6            | cotton:3            | sleeve shirt:3               | plane:2                  |
| flute:18         | crane:6                    | cleaning mop:3      | fencing mesh:3               | fishing rod:2            |
| hand glove:18    | weight equipment:6         | decoration item:3   | cooling glasses:3            | plastic disk:2           |
| black bag:18     | spray:6                    | white ball:3        | sticky notes:3               | iron stand:2             |
| shovel:18        | red carpet:6               | white boat:3        | album:3                      | table fan:2              |
| screen:18        | steamer:6                  | legs:3              | stick paper:3                | shed:2                   |
| apron:18         | wooden bench:6             | wallet:3            | file handle:3                | goat:2                   |
| headband:17      | commode:6                  | globe:3             | hand kerchief:3              | head cover:2             |
| plant:17         | wristband:6                | trimble scanning:3  | id tag:3                     | fencing rod:2            |
| seat:17          | wiper:6                    | avacado:3           | snow stick:3                 | dartboard:2              |
| sock:16          | sword:6                    | handles:3           | metal tool:3                 | blue banner:2            |
| red cloth:16     | leftshoe:6                 | rubiks cube:3       | treadmill:3                  | textperson:2             |
| knob:16          | scissors:6                 | right mirror:3      | spin bike:3                  | shampoo bottle:2         |
| coin:15          | books:6                    | metal wire:3        | left slipper:3               | tperson:1                |
| ship:15          | green box:6                | chopstick:3         | tongs:3                      | boxcap:1                 |
| umbrella:15      | extension box:6            | nail cutter:3       | wrist belt:3                 | parchute:1               |
| blanket:15       | soap:6                     | hatchet:3           | handwash:3                   | bracelette:1             |
| blue box:15      | right leg:6                | black file:3        | honey tray:3                 | letter e:1               |
| pin:15           | traffic cone:6             | hand catcher:3      | shutter gear box:3           | dishwasher:1             |
| tv:15            | walkie talkie:6            | speed meter:3       | gear box:3                   | frige:1                  |
| mask:15          | black stick:6              | inhaler:3           | shop:3                       | shie:1                   |
| drill machine:15 | ski:6                      | horn switch:3       | football net:3               | wodd:1                   |
| brick:15         | trunk belt:6               | letter m:3          | sink:3                       | coffee maker:1           |
| cabinet:15       | boot:6                     | t shirt roll:3      | breather:3                   | blue suit:1              |
| tape:15          | tab:6                      | menu book:3         | handle knob:3                | pine apple slice:1       |
| cylinder:15      | weight lifting equipment:6 | green jacket:3      | red machine:3                | bandage clip:1           |
| camel:15         | blue pant:6                | ski helmet:3        | show case:3                  | new paper:1              |
| windmill:15      | watering can:6             | traffic light:3     | yellow stone:3               | pany:1                   |
| red cap:15       | left leg:6                 | steel bowl:3        | chappal:3                    | newspaper:1              |
| leg:15           | disk:6                     | water melon piece:3 | white background:3           | water melon peice:1      |
| gate:15          | weight lifting:6           | toy brick:3         | wrapper:3                    | show peice:1             |
| bird:15          | cigar pipe:6               | flip flop:3         | land line:3                  | dart board:1             |
| cardboard:15     | lefthand:6                 | left socks:3        | ventilator:3                 | white cupboard:1         |

Table 8: Full list of object categories named by annotators in TAP-Vid-Kinetics, continued.

|                  |                        |                              |                        |                          |
|------------------|------------------------|------------------------------|------------------------|--------------------------|
| hand bag:15      | trimmer:6              | knife holder:3               | suit:3                 | head:1                   |
| van:15           | mortar board holder:6  | megaphone speaker:3          | sleeveless tshirt:3    | oxygen pumping machine:1 |
| wooden box:15    | metal:6                | barricating floor stand:3    | detector:3             | wall poster top:1        |
| iron rod:15      | wrench:6               | porch swing:3                | sniper box:3           | cushoin:1                |
| pad:15           | spanner:6              | watertank:3                  | thermocool sheet:3     | galss:1                  |
| axe:15           | basin:6                | tiger:3                      | track pant:3           | frame top:1              |
| berries:15       | couch:6                | black suit:3                 | white bucket:3         | peerson:1                |
| wooden object:15 | bud:6                  | wooden shelf:3               | green truck:3          | pizza oven:1             |
| gun:15           | white tshirt:6         | red clip:3                   | circle balloon:3       | gyn bench:1              |
| lock:15          | chips packet:6         | hairpin:3                    | toy block:3            | branch:1                 |
| tent:15          | burner:6               | mobile case:3                | traffic light toy:3    | preson:1                 |
| idol:15          | vase:6                 | wood blocks:3                | spectacle:3            | sipper:1                 |
| can:14           | eyelash curler:6       | black pipe:3                 | baby dress:3           | street light:1           |
| hockey stick:14  | marble:6               | blue block:3                 | baby apron:3           | headlight:1              |
| scarf:14         | ribbon roll:5          | finger tool:3                | sausage:3              | cardshelf:1              |
| cone:14          | blue sheet:5           | green shirt:3                | blue chalk:3           | persoon:1                |
| black shirt:14   | container:5            | glue gun tool:3              | soap stand:3           | greenpipe:1              |
| white cloth:14   | pig:5                  | iron frame:3                 | gamepad:3              | glasse middle:1          |
| clip:13          | chip:5                 | umberlla stand:3             | yellow toy:3           | glass right:1            |
| white sheet:13   | guage:5                | bathing basin:3              | door handler:3         | glass left:1             |
| flower vase:13   | tube light:5           | plastic curtain:3            | purple bottle:3        | ladder:1                 |
| bin:12           | left mirror:5          | fan hanger:3                 | c c camera:3           | vihiicle:1               |
| grill:12         | kite:5                 | rod piece:3                  | hairband:3             | paper shredder:1         |
| bed sheet:12     | playing machine:5      | orange tool:3                | hut:3                  | frame middle:1           |
| black jacket:12  | dish washer:5          | maroon cloth:3               | yellow paper:3         | persson:1                |
| gym equipment:12 | ice axe:5              | yellow cloth:3               | syringe:3              | form:1                   |
| file:12          | photoframe:5           | telephone:3                  | metal piece:3          | tbowl:1                  |
| duck:12          | show piece:5           | car number plate:3           | drawer:3               | boardboard:1             |
| headset:12       | wooden log:5           | blue thread:3                | toy house:3            | plastic desk:1           |
| pumpkin:12       | skipping rope:5        | toy stick:3                  | marker:3               | whiteshirt:1             |
| black cloth:12   | white shirt:5          | olive oil bottle:3           | barricade:3            | palne:1                  |
| sandal:12        | hoddie:5               | detecting machine:3          | hand break:3           | bowling equipment:1      |
| sprayer:12       | cpu:5                  | mixing bowl:3                | wooden piece:3         | hooddie:1                |
| puzzle:12        | dining table:5         | steel tool:3                 | tambourine:3           | res cloth:1              |
| elephant:12      | point:5                | paint filler:3               | guitar bag:3           | red scarf:1              |
| chess coin:12    | track:5                | piano keyboard:3             | white bottle:3         | yelllow object:1         |
| tissue roll:12   | hair dryer:4           | tv stand:3                   | glass door:3           | tabel:1                  |
| skirt:12         | gauge:4                | toy car:3                    | stop indicator board:3 | plastic object:1         |
| wooden block:12  | building:4             | cutting board:3              | leaning bench:3        | mug:1                    |
| tong:12          | black thread:4         | sound box:3                  | bar lifting:3          | balack band:1            |
| wood piece:12    | motor:4                | tambourine hand percussion:3 | threadmill:3           | front wheel:1            |
| wooden plank:12  | iron box:4             | pool lane divider:3          | mosquito killer:3      | spects left:1            |
| diaper:12        | power box:4            | desk:3                       | shelf:3                | white rolling button:1   |
| wrist watch:12   | wooden stick:4         | wooden tray:3                | dvd player:3           | person back shoulder:1   |
| racket:12        | blue funnel:3          | bread:3                      | paper crusher:3        | person forehead:1        |
| lid:12           | handler:3              | red jacket:3                 | auto:3                 | cupboard top:1           |
| flower pot:12    | plucker tool:3         | work piece:3                 | woollen:3              | cupboard middle:1        |
| glasses:12       | skate boarding:3       | red blanket:3                | blue color object:3    | cupboard bottom:1        |
| hair clip:12     | iron lid:3             | cloths:3                     | green object:3         | personn:1                |
| carton box:12    | greentub:3             | pebble:3                     | person hand:3          | rind:1                   |
| truck:12         | cement lid:3           | trowel:3                     | candle cap:3           | door mate:1              |
| joystick:12      | router:3               | red suit:3                   | cube:3                 | jeans jacket:1           |
| keyboard:12      | yellow carpet:3        | rope ball:3                  | brown box:3            | white card board:1       |
| bulb:12          | tractor:3              | woolen roll:3                | paper glass:3          | ttshirt:1                |
| screw driver:12  | baby bottle:3          | man:3                        | wood machine:3         | table right:1            |
| stud:12          | kids walker:3          | talcum powder:3              | light box:3            | table middle:1           |
| plastic cover:12 | store:3                | drink bottle:3               | laptop table:3         | table left:1             |
| right glove:11   | dumbbell set:3         | turban:3                     | rack cupboard:3        | parachute skydiving:1    |
| fruit:11         | left ear stud:3        | ash tshirt:3                 | tyer:3                 | nuts packet bottom:1     |
| switch:11        | needle bag:3           | round disk:3                 | orange tshirt:3        | perason:1                |
| green pipe:11    | parachute rope:3       | safety jacket:3              | rod stand:3            | blue stone:1             |
| text:11          | controller:3           | plank:3                      | red curtain:3          | swimming goggles:1       |
| switchboard:10   | violin:3               | teddy:3                      | dryer:3                | hesd cover:1             |
| kangaroo:10      | cellphone:3            | chart:3                      | railing:3              | photofrane:1             |
| plastic bag:10   | kids slide:3           | cake pan:3                   | topwear:3              | balll:1                  |
| paint brush:9    | red toy:3              | orange object:3              | strainer:3             | nuts packet top:1        |
| egg yolk:9       | electrical box cover:3 | tank:3                       | brown bag:3            | nuts packet middle:1     |
| head light:9     | big spoon:3            | room cleaner:3               | mascara stick:3        | frame bottom:1           |
| black tshirt:9   | left sock:3            | wheel cap:3                  | pink sheet:3           |                          |

Table 9: Full list of object categories named by annotators in TAP-Vid-Kinetics, continued.

## References

- [1] Greff, K., Belletti, F., Beyer, L., Doersch, C., Du, Y., Duckworth, D., Fleet, D.J., Gnanaprasam, D., Golemo, F., Herrmann, C., Kipf, T., Kundu, A., Lagun, D., Laradji, I., Liu, H.T.D., Meyer, H., Miao, Y., Nowrouzezahrai, D., Oztireli, C., Pot, E., Radwan, N., Rebain, D., Sabour, S., Sajjadi, M.S.M., Sela, M., Sitzmann, V., Stone, A., Sun, D., Vora, S., Wang, Z., Wu, T., Yi, K.M., Zhong, F., Tagliasacchi, A.: Kubric: a scalable dataset generator. In: Proceedings of the IEEE conference on computer vision and pattern recognition (2022)
- [2] Harley, A.W., Fang, Z., Fragkiadaki, K.: Particle videos revisited: Tracking through occlusions using point trajectories. In: European Conference on Computer Vision (2022)
- [3] Hosni, A., Rhemann, C., Bleyer, M., Rother, C., Gelautz, M.: Fast cost-volume filtering for visual correspondence and beyond. *IEEE Transactions on Pattern Analysis and Machine Intelligence* **35**(2), 504–511 (2012)
- [4] Huber, P.J.: Robust estimation of a location parameter. In: Breakthroughs in statistics, pp. 492–518. Springer (1992)
- [5] Jabri, A., Owens, A., Efros, A.: Space-time correspondence as a contrastive random walk. *Advances in neural information processing systems* **33**, 19545–19560 (2020)
- [6] Jiang, W., Trulls, E., Hosang, J., Tagliasacchi, A., Yi, K.M.: Cotr: Correspondence transformer for matching across images. In: Proceedings of the IEEE/CVF International Conference on Computer Vision. pp. 6207–6217 (2021)
- [7] Lai, Z., Lu, E., Xie, W.: Mast: A memory-augmented self-supervised tracker. In: Proceedings of the IEEE/CVF Conference on Computer Vision and Pattern Recognition. pp. 6479–6488 (2020)
- [8] Lai, Z., Xie, W.: Self-supervised learning for video correspondence flow. *arXiv preprint arXiv:1905.00875* (2019)
- [9] Levine, S., Finn, C., Darrell, T., Abbeel, P.: End-to-end training of deep visuomotor policies. *The Journal of Machine Learning Research* **17**(1), 1334–1373 (2016)
- [10] Li, X., Liu, S., De Mello, S., Wang, X., Kautz, J., Yang, M.H.: Joint-task self-supervised learning for temporal correspondence. *Advances in Neural Information Processing Systems* **32** (2019)
- [11] Li, Z., Snavely, N.: Megadepth: Learning single-view depth prediction from internet photos. In: Proceedings of the IEEE Conference on Computer Vision and Pattern Recognition. pp. 2041–2050 (2018)
- [12] Lin, J., Gan, C., Wang, K., Han, S.: Tsm: Temporal shift module for efficient and scalable video understanding on edge devices. *IEEE transactions on pattern analysis and machine intelligence* (2020)
- [13] Scharstein, D., Szeliski, R.: A taxonomy and evaluation of dense two-frame stereo correspondence algorithms. *International journal of computer vision* **47**(1), 7–42 (2002)
- [14] Teed, Z., Deng, J.: Raft: Recurrent all-pairs field transforms for optical flow. In: European conference on computer vision. pp. 402–419. Springer (2020)
- [15] Vondrick, C., Shrivastava, A., Fathi, A., Guadarrama, S., Murphy, K.: Tracking emerges by colorizing videos. In: Proceedings of the European conference on computer vision (ECCV). pp. 391–408 (2018)
- [16] Wang, X., Jabri, A., Efros, A.A.: Learning correspondence from the cycle-consistency of time. In: Proceedings of the IEEE/CVF Conference on Computer Vision and Pattern Recognition. pp. 2566–2576 (2019)
- [17] Xu, J., Wang, X.: Rethinking self-supervised correspondence learning: A video frame-level similarity perspective. In: Proceedings of the IEEE/CVF International Conference on Computer Vision. pp. 10075–10085 (2021)



- [18] Zbontar, J., LeCun, Y., et al.: Stereo matching by training a convolutional neural network to compare image patches. *J. Mach. Learn. Res.* **17**(1), 2287–2318 (2016)
